# Supplementary material for: Emotion regulation, academic buoyancy, and academic adjustment of university students within a self-determination theory framework: A systematic review
Source: Front Psychol. 2022 Nov 29;13:1057697. doi: 10.3389/fpsyg.2022.1057697 (PMC9746693; doi:10.3389/fpsyg.2022.1057697)
Supplement: Supplementary file 2 [file Table_2.XLSX]

## Sheet: Table 2
																SCREENING QUESTIONS		1. QUALITATIVE STUDIES					2. RANDOMIZED CONTROLLED TRIALS					3. NON-RANDOMIZED STUDIES					4. QUANTITATIVE DESCRIPTIVE STUDIES					5. MIXED METHODS STUDIES
First author	Year	Citation	Country, Region	Study Design (Quantitative, Qualitative, or Mixed Methods)	Data Collection Period	Population characteristics n, age(mean), Gender, Ethnicity	Sampling and recruitment	Topics Investigated	Outcome of Interest	Predictors Associated with HE students' academic buoyancy	Outcome of academic buoyancy	(Ecological Institution's Environment) Protective Factors (if any)	(Ecological Institution's Environment) Risk Factors (if any)	Top-Line Findings	MMAT Risk of Bias Tool Scoring Yes = 2 Partially = 1 No = 0 Can't tell = 0	S1. Are there clear research questions?	S2. Do the collected data allow to address the research questions?	1.1. Is the qualitative approach appropriate to answer the research question?	1.2. Are the qualitative data collection methods adequate to address the research question?	1.3. Are the findings adequately derived from the data?	1.4. Is the interpretation of results sufficiently substantiated by data?	1.5. Is there coherence between qualitative data sources, collection, analysis and interpretation?	2.1. Is randomization appropriately performed?	2.2. Are the groups comparable at baseline?	2.3. Are there complete outcome data?	2.4. Are outcome assessors blinded to the intervention provided?	2.5 Did the participants adhere to the assigned intervention?	3.1. Are the participants representative of the target population?	3.2. Are measurements appropriate regarding both the outcome and intervention (or exposure)?	3.3. Are there complete outcome data?	3.4. Are the confounders accounted for in the design and analysis?	3.5. During the study period, is the intervention administered (or exposure occurred) as intended?	4.1. Is the sampling strategy relevant to address the research question?	4.2. Is the sample representative of the target population?	4.3. Are the measurements appropriate?	4.4. Is the risk of nonresponse bias low?	4.5. Is the statistical analysis appropriate to answer the research question?	5.1. Is there an adequate rationale for using a mixed methods design to address the research question?	5.2. Are the different components of the study effectively integrated to answer the research question?	5.3. Are the outputs of the integration of qualitative and quantitative components adequately interpreted?	5.4. Are divergences and inconsistencies between quantitative and qualitative results adequately addressed?	5.5. Do the different components of the study adhere to the quality criteria of each tradition of the methods involved?	Risk of Bias Score	Included in qualitative synthesis? (Yes/No)	If not included in qualitative synthesis, what is the reason for exclusion?	Any Additional Comments
Aydin	2020	Aydin, G. & Michou, A. (2020). Self-determined motivation and academic buoyancy as predictors of achievement in normative settings. The British Psychological Society, 90.	Turkey	quantitative		267 students (56.9% female), Mean Age: 19.1	convenient sampling (according to the willingness of their teachers to provide class time to administer the survey).	This study investigated: a) the relation of perceived need satisfaction (or frustration) to autonomous (or controlled motivation) at the beginning of a 2-month course (T1) and b) in sequence, their relation to subsequent (T2) academic buoyancy and 3) through it, to achievement in the 2-month course's final examination (T3).	academic buoyancy, achievement	need satisfaction/frustration, autonomous/controlled motivation	achievement			1) T1 need satisfaction was positively related to T1 autonomous motivation (when students perceived that their that their need for autonomy was satisfied, they tended to have a good quality of motivation (vs need frustration -> poor quality of motivation), 2) controlled motivation was negatively related to T2 academic buoyancy (students feel academic buoyant when they are involved in classroom ta…		2	1																1	2	2	1	2						11	Yes
Holliman	2019	Holliman, A.; Sheriston, L.; Martin, A.; Collie, R. & Sayer, D. (2019). Adaptability: does students' adjustment to univerity predict their mid-course academic achievement and satisfaction? Journal of Further and Higher Education, 10.	UK	quantitative		90 first-year undergraduates students (80% female); Age Range: 18-48, Mean Age: 19.84	opportunity sampling	Two research questions: a) what is the relationship between university students' adaptability, academic buoyancy, academic motivation, and their academic outcomes (mid-course academic achievement and satisfaction) and b) is university students' adaptability uniquely associated with their academic outcomes, beyond the influences of academic buoyancy and academic motivation?	academic achievement and satisfaction	students' adaptability	academic satisfaction and achievement			1) only adaptability was a significant unique predictor of students' university academic achievement (beyond the effects of buoyancy and motivation, 2) beyond the effects of buoyancy and academic motivation, adaptability significantly predicted higher course satisfaction		2	1																1	1	2	1	2						10	Yes
Jahedizadeh	2021	Jahedizadeh, S.; Ghonsooly, B. & Ghanizadeh, A. (2021). A model of language students' sustained flow, personal best, buoyancy, evaluation apprehension, and academic achievement. Porta Linguarum, 35.		quantitative	fall semester 2018	376 students (329 females); Age Range: 18-56; Mean Age: 24	online questionnaires	Study aim: to examine the causal relationships among four psychological variables including sustained flow, personal bests, buoyancy and evaluation apprehension as well as students' academic achievement within a single framework.	academic achievement	personal best goals	academic achievement			The results of the study indicated that 1) enhancing students' personal best goals, increases their sustained flow experiences, 2) personal bests have a significant and negative effect on students' evaluation apprehension, 3) the personal bests and students' academic buoyancy are associated and personal best affects buoyancy positively and significantly, 4) a significant relationship was found be…		2	1																2	1	2	1	2						11	Yes
Table 2 Empirical studies on academic buoyancy
